# Supplementary material for: Comparative Transcriptome Analysis of Different Dendrobium Species Reveals Active Ingredients-Related Genes and Pathways
Source: PubMed Central journal article supplement (PMC7037882; doi:10.3390/ijms21030861), 2020-01-29
Supplement: ijms-21-00861-s001.pdf [file ijms-21-00861-s001.pdf]

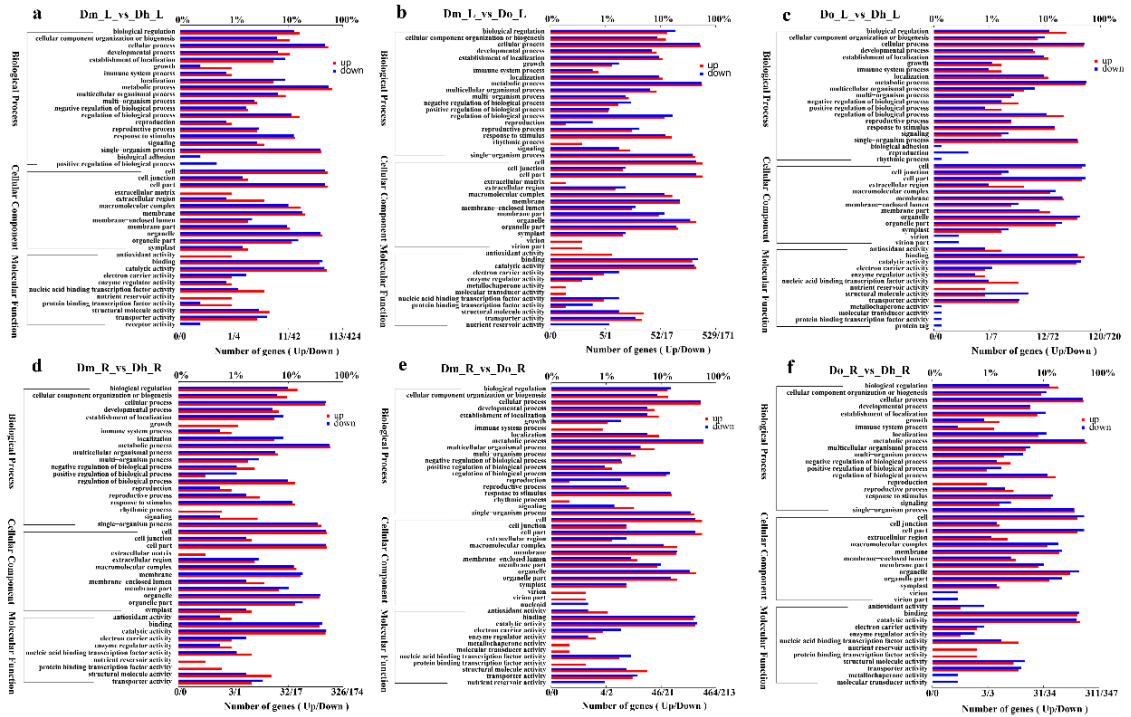

**Supplementary figure 1 GO annotations of up and down regulated DEGs.** The bottom x-axis indicates the number of DEGs annotated to a GO term, the upper x-axis indicates the proportion of DEGs annotated to a GO terms to the total number of all GO annotated DEGs; and the y-axis represents each detailed classification of GO. a. Dm\_L vs Dh\_L GO annotation; b. Dm\_L vs. Do\_L GO annotation; c. Do\_L vs. Dh\_L GO annotation; d. Dm\_R vs Dh\_R GO annotation; e. Dm\_R vs. Do\_R GO annotation; f. Do\_R vs. Dh\_R GO annotation.



**Supplementary Figure 2 Kyoto Encyclopedia of Genes and Genomes (KEGG) pathway enrichment of DEGs.** The x-axis represents the pathway name, and the y-axis represents the enrichment ratio (sample number/background number). a. Dm\_L vs. Dh\_L; b. Dm\_L vs. Do\_L; c. Do\_L vs. Dh\_L; d. Dm\_R vs. Dh\_R; e. Dm\_R vs. Do\_R; f. Do\_R vs. Dh\_R. All pathways in the figure with asterisks indicate significant KEGG enrichment, with three asterisks indicating p-value < 0.001, two asterisks indicating p-value < 0.01, one asterisks indicating p-value < 0.05.
